# Supplementary material
Source: Royal Society of Chemistry journal article supplement (doi:10.1039/d6cp00491a)
Supplement: d6cp00491a1.pdf [file d6cp00491a1.pdf]

*Supporting Information for*  
**Self-assembly behavior of Phenanthroimidazole and Naphthalene Pendant  
Photoluminescent Ionic Liquid and its implication towards cascade Detection Hg<sup>2+</sup> and  
I<sup>-</sup> ions**

Najmin Tohora and Sudhir Kumar Das\*

Department of Chemistry, University of North Bengal, Raja Rammohunpur, Darjeeling,

West Bengal-734013, India

Corresponding author: (Dr. S. K. Das; E-mail: [sudhirkumardas@nbu.ac.in](mailto:sudhirkumardas@nbu.ac.in))

## **S1. Experimental sections**

### **S1.1 General Method & Instrumentations**

Chemical reagents are purchased from Sigma Aldrich, India, and used without further purification. Anhydrous solvents and HPLC spectroscopic grade were obtained from Merck, India. 9, 10-phenanthrenequinone, 1-naphthaldehyde and trihexyltetradecylphosphonium chloride ([TTP]Cl) are purchased from Sigma-Aldrich, India. All the metal salts, anions, and biologically relevant molecules used in the present study are purchased from Sigma-Aldrich (India) and TCI (India), respectively. Dimethyl sulphoxide (DMSO- $d_6$ ) is obtained from Sigma-Aldrich, India, and used for NMR spectral analysis. Quatro Micro API (MICROMASS, UK), 1c-WATERS 2695 spectrometer having detector PDA2998, ESI\_Negative with capillary voltage 3 kV, Cone -30 V and extractor-3 V employing source and dissolving temperature -90°C and -250°C respectively using dissolving gas-450 Litre/hour with flow rate-10  $\mu$ L/min. UV-visible spectral studies are carried out on a HITACHI U-2910, and fluorescence experiments are carried out on a HITACHI F-7100 fluorimeter with a 5 nm excitation and emission slit, respectively. Throughout the steady-state emission experiment, excitation and emission wavelengths are maintained at 370 nm and 390-720 nm, respectively.

The size and shape of the **nBTNP** are estimated by field emission scanning electron microscopy (SEM) (ZEISS) employing an operating voltage of 50 kV by drop casting the required amounts of **nBTNP** on the carbon-coated copper grids. The average particle size is determined by considering the size of more than 100 particles. The hydrodynamic radius of **nBTNP** is measured employing the dynamic light scattering (DLS) technique (Anton Paar Litesizer 500). The zeta potential ( $\zeta$ ) of nanoparticles is also obtained by this instrument using a capillary  $\zeta$ -cell.

### **S1.2 General procedure for UV-visible and fluorescence experiments**

The stock solutions of the sensor (23  $\mu\text{M}$ ), metal chloride solutions ( $1.2 \times 10^{-3} \text{ M}$ ), and the sodium & potassium salts of the anions ( $1.2 \times 10^{-3} \text{ M}$ ) were prepared in aqueous solution. The fluorescence response of various anions ( $\text{ClO}_4^-$ ,  $\text{F}^-$ ,  $\text{BPh}_4^-$ ,  $\text{SO}_4^{2-}$ ,  $\text{I}^-$ ,  $\text{Cl}^-$ ,  $\text{Br}^-$ ,  $\text{CO}_3^{2-}$ ,  $\text{PO}_4^{3-}$ ) and metal ions ( $\text{Al}^{3+}$ ,  $\text{Ba}^{2+}$ ,  $\text{Ca}^{2+}$ ,  $\text{Cu}^{2+}$ ,  $\text{K}^+$ ,  $\text{Mn}^{2+}$ ,  $\text{Na}^+$ ,  $\text{Ni}^{2+}$ ,  $\text{Pb}^{2+}$ ,  $\text{Sn}^{2+}$ ,  $\text{Zn}^{2+}$ ) were investigated. The probe's selectivity has been tested for all metal ions and anions using fluorescence experiments. To 2 mL of the sensor, 33  $\mu\text{M}$  of each metal ion solution was added and stirred before fluorescence measurements. The fluorescence and UV-visible titrations were performed using varying concentrations of metal ions and anion solutions.

### S1.3 Measurement of fluorescence quantum yield

For the estimation of fluorescence quantum yield, we have considered the quinine sulfate as a standard in 1(N)  $\text{H}_2\text{SO}_4$  ( $\Phi=0.546$ )<sup>1</sup>. Using the equation 
$$\Phi = \Phi_s \left( \frac{F_x}{F_s} \right) \left( \frac{A_s}{A_x} \right) \left( \frac{\eta_x^2}{\eta_s^2} \right)$$
, where  $\Phi$  stands for quantum yield,  $F$  is the integrated fluorescence intensity,  $A$  is the absorbance,  $\eta$  defines the refractive index of the solvent, subscript 's' defines the standard quinine sulfate, and  $x$  is the unknown one, we have calculated the quantum yield ( $\Phi$ ) of the nano-optode **nBTNP** and **nBTNP** with  $\text{Hg}^{2+}$ .

**Characterization of compound C:** ( $^1\text{H}$  NMR,  $\text{DMSO}-d_6$ , 400 MHz, in ppm units): 11.93 (s, 1H, NH), 8.93 (d, 2H), 8.55 (d, 1H), 8.12 (d, 2H), 8.08 (d, 1H), 8.04 (d, 1H), 7.95 (d, 1H), 7.88 (dd, 2H), 7.82 (dd, 2H), 7.61 (dd, 1H), 7.55 (d, 2H) (**Fig. S1**).

**Characterization of compound D:** ( $^1\text{H}$  NMR,  $\text{DMSO}-d_6$ , 400 MHz, in ppm units): 8.90 (d, 2H), 8.38 (d, 1H), 8.32 (d, 1H), 8.10 (d, 2H), 8.08 (d, 1H), 7.93 (d, 1H), 7.9 (dd, 2H), 7.8 (dd, 2H), 7.79 (dd, 1H), 7.55 (d, 2H) (**Fig. S3**).

**Characterization of BTNP:** ( $^1\text{H}$  NMR,  $\text{DMSO}-d_6$ , 400 MHz, in ppm units): 8.90 (d, 2H), 8.38 (d, 1H), 8.32 (d, 1H), 8.1 (d, 2H), 8.08 (d, 1H), 7.93 (d, 1H), 7.90 (dd, 2H), 7.80 (dd,

2H), 7.79 (dd, 1H), 7.55 (d, 2H), 2.22-0.88 (various m, 68 H) (**Fig. S5**).  $^{31}\text{P}$  NMR (400 MHz, DMSO- $d_6$ ,  $\delta$  (ppm): 33.93 (**Fig. S8**).

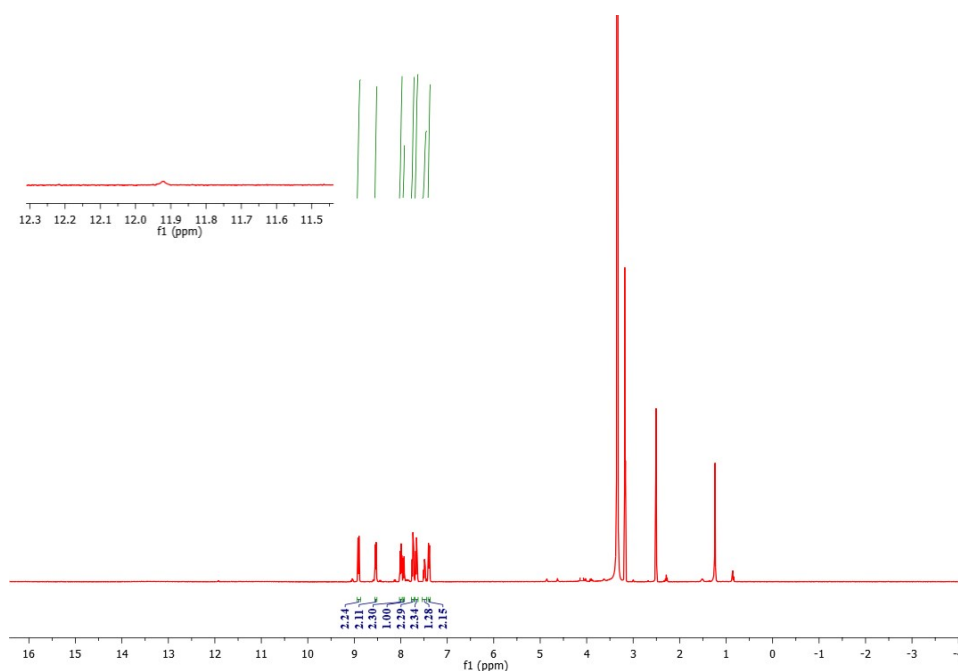

**Fig. S1:**  $^1\text{H}$  NMR spectrum (DMSO- $d_6$ , 400 MHz) of compound C.

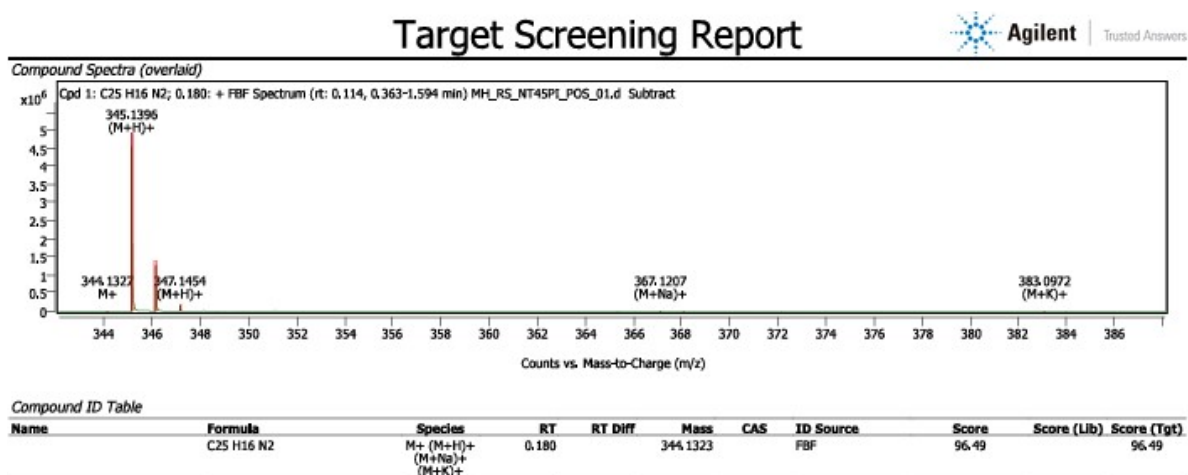

**Fig. S2:** HRMS spectra of compound C.



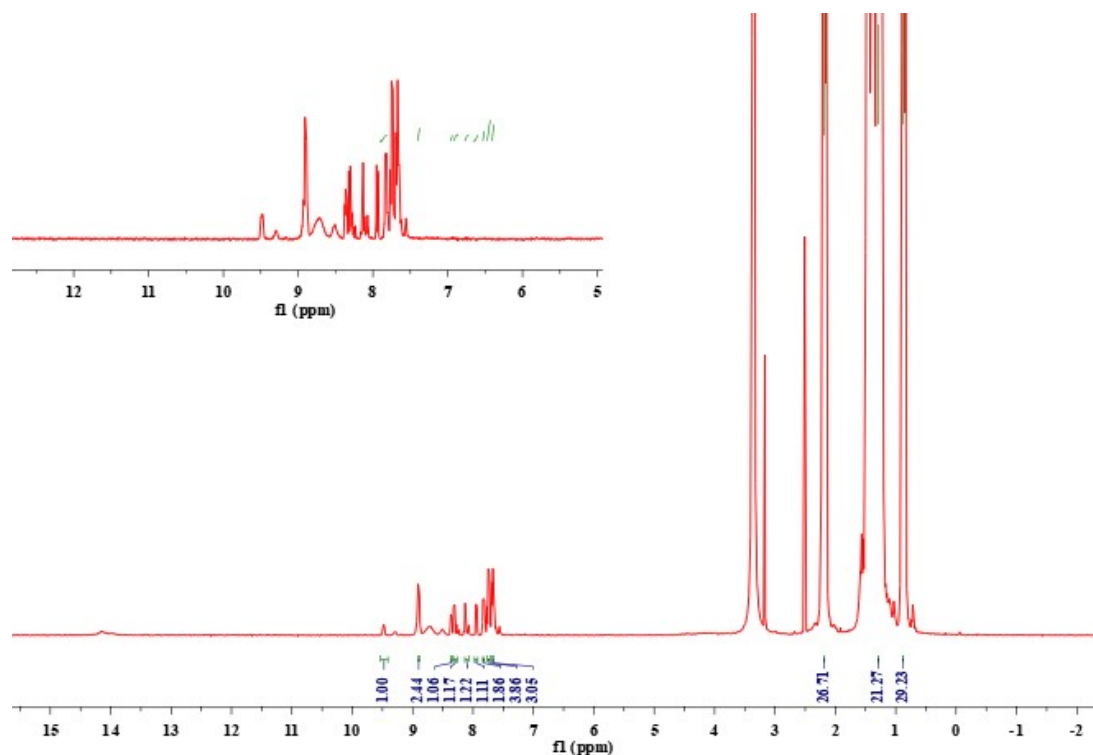

**Fig. S5:** <sup>1</sup>H NMR spectrum (DMSO-*d*<sub>6</sub>, 400 MHz) of BTNP.

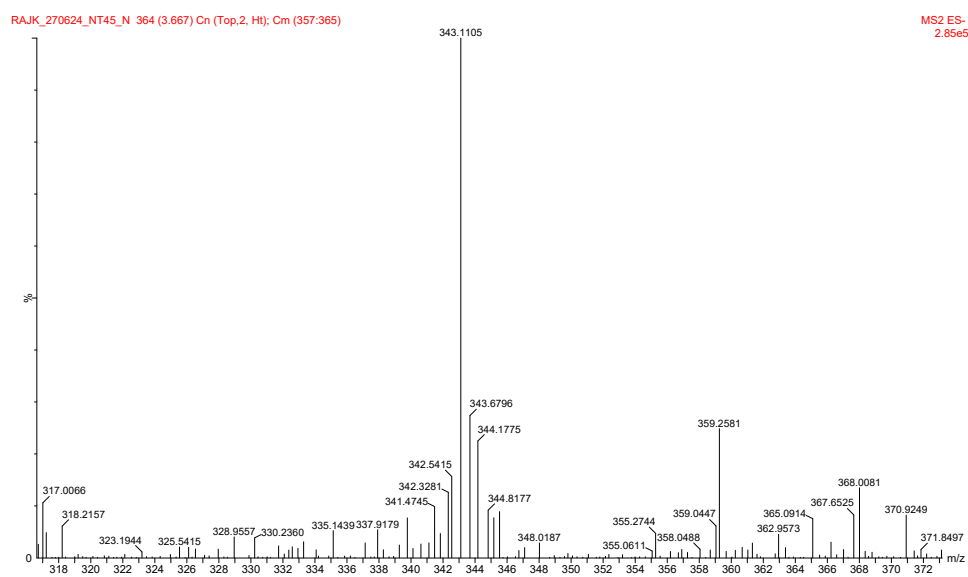

**Fig. S6:** LC-MS spectra of the negative component of BTNP.

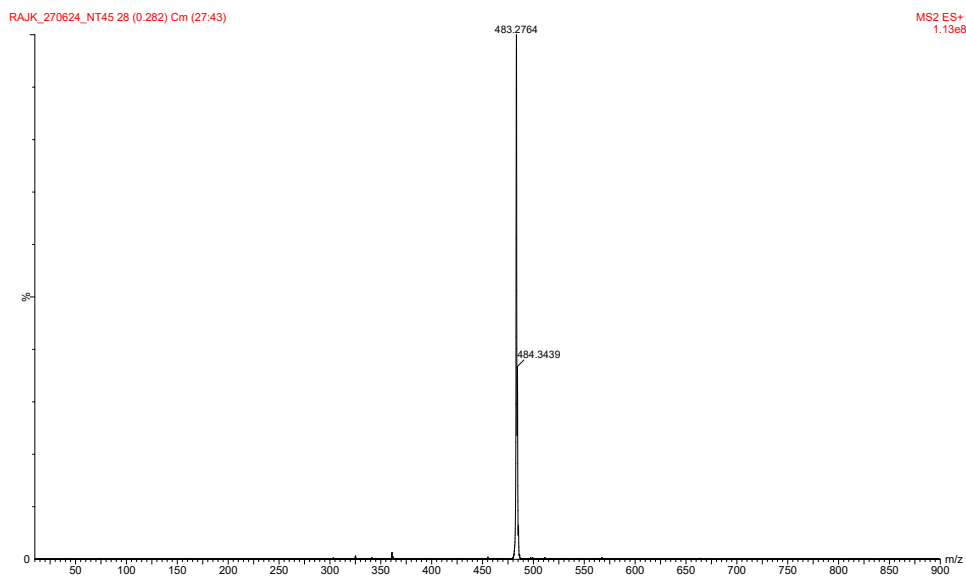

**Fig. S7:** LC-MS spectra of the positive component of BTNP.

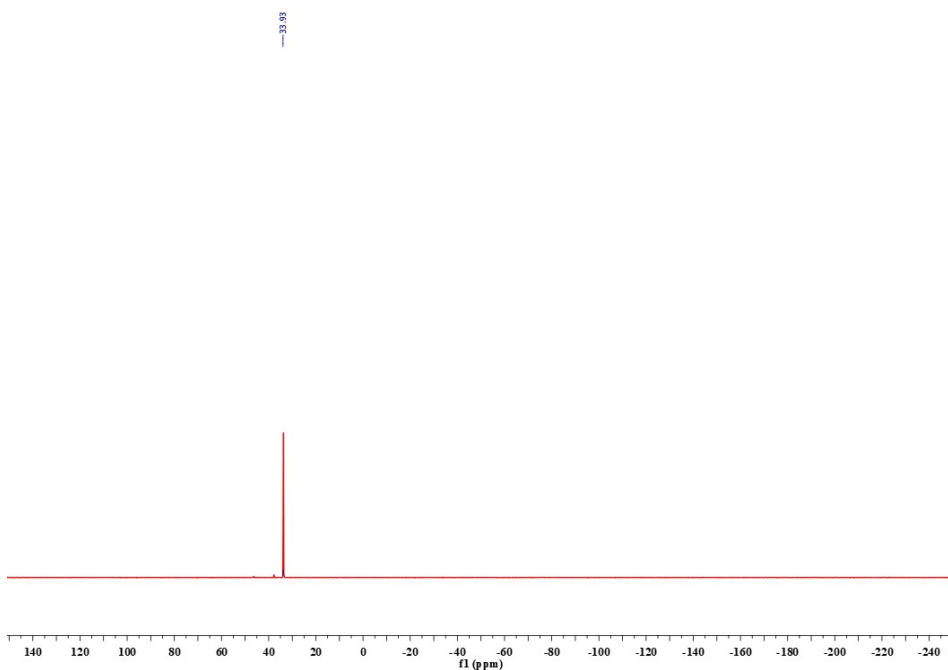

**Fig. S8:**  $^{31}\text{P}$  NMR spectrum (DMSO- $d_6$ , 400 MHz) of BTNP.

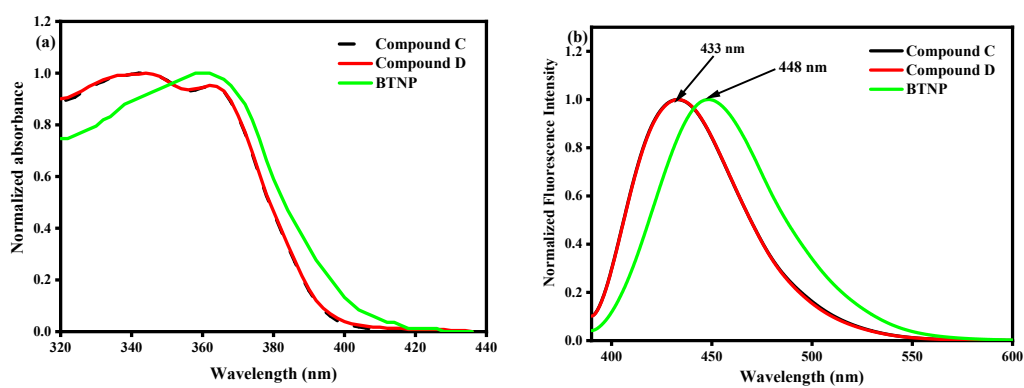

**Fig. S9: (a)** The normalized absorption spectra of compound C, D, and **BTNP** in DMSO. **(b)**

The normalized fluorescence spectra of compounds C, D, and **BTNP** in DMSO.

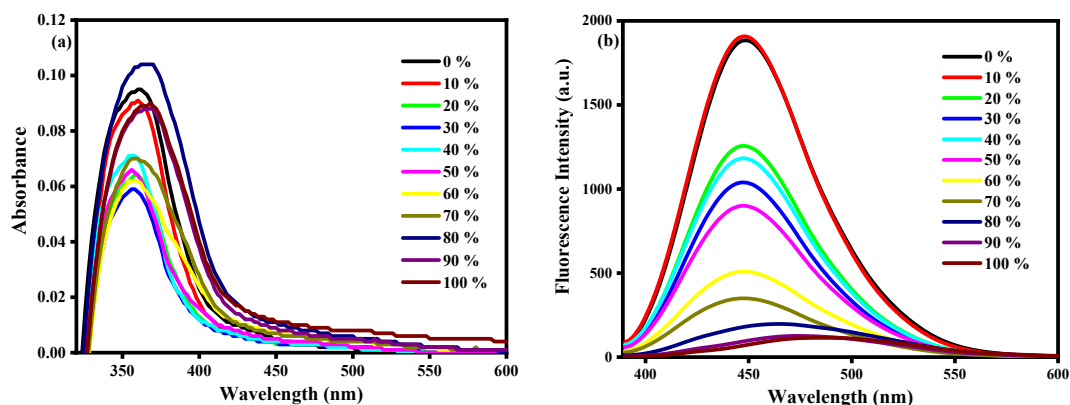

**Fig. S10: (a)** UV-vis absorption spectra of **BTNP** in different percentages of water. **(b)**

Fluorescence spectra of **BTNP** in water-DMSO mixed solvents demonstrating ACQ.

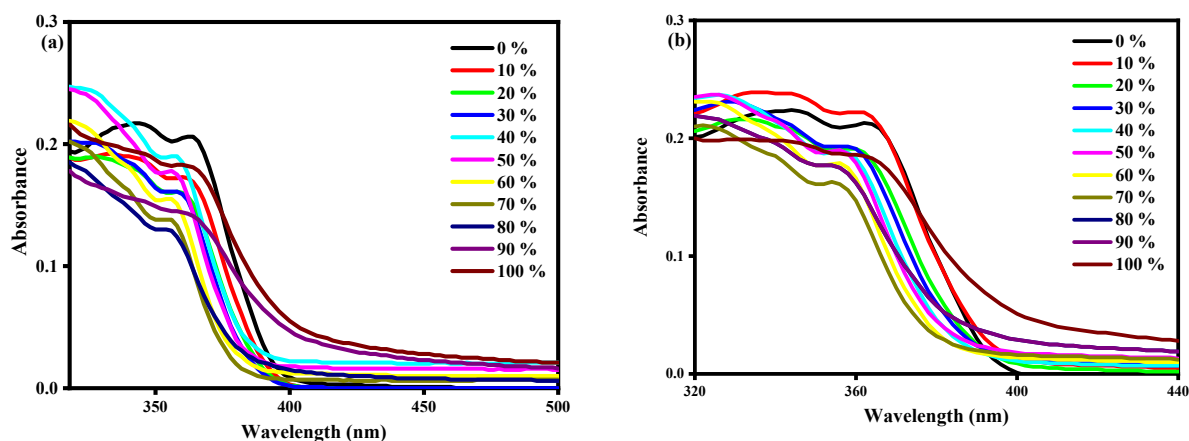

**Fig. S11: (a)** UV-vis absorption spectra of Compound C in different percentages of water. **(b)**

UV-vis absorption spectra of Compound D in different percentages of water.

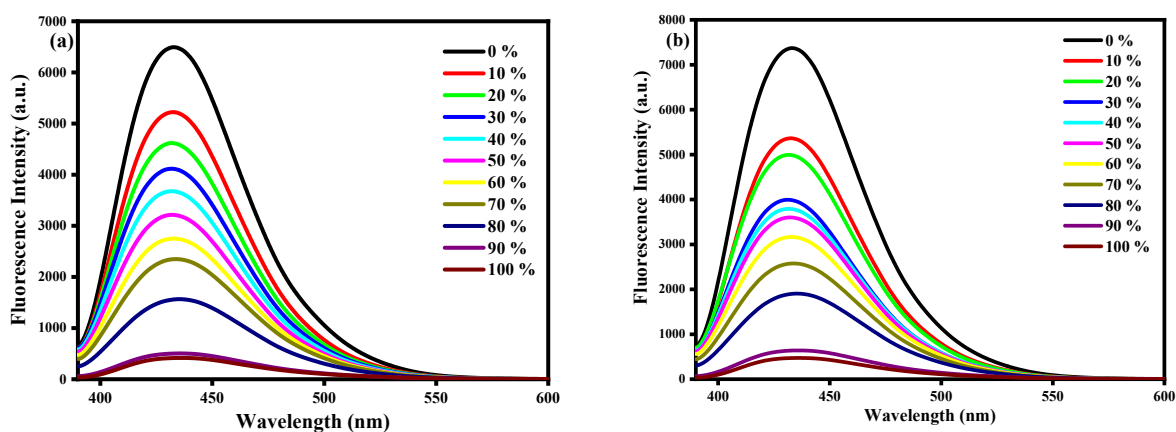

**Fig. S12:** (a) Fluorescence spectra of Compound C in water-DMSO mixed solvents. (b) Fluorescence spectra of Compound D in water-DMSO mixed solvents.

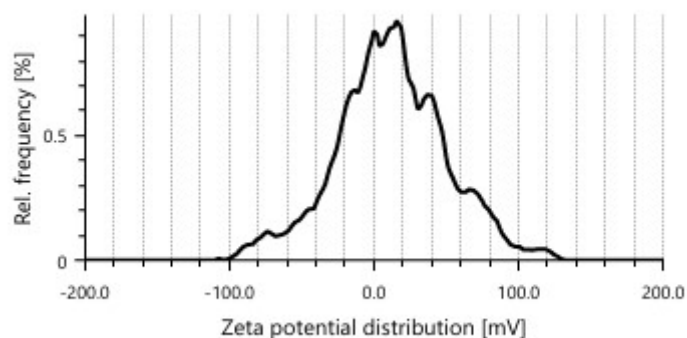

**Fig. S13:** The relative frequency vs. zeta potential distribution curve for the determination of the zeta potential of **nBTNP**.

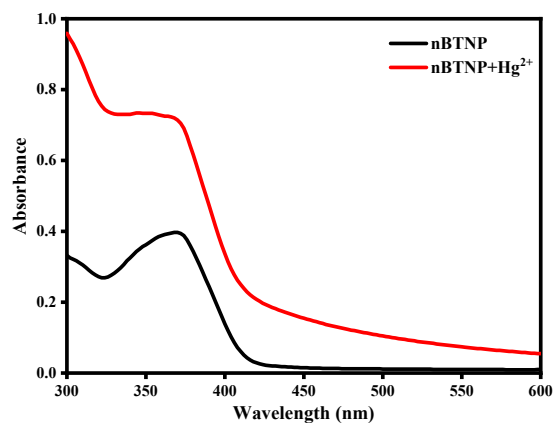

**Fig. S14:** UV-visible absorption spectra of **nBTNP** and **nBTNP+Hg<sup>2+</sup>**.

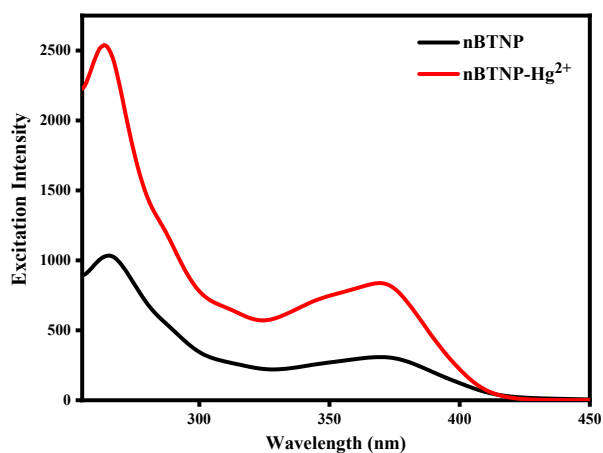

**Fig. S15:** The excitation spectra of **nBTNP** and **nBTNP-Hg<sup>2+</sup>**.

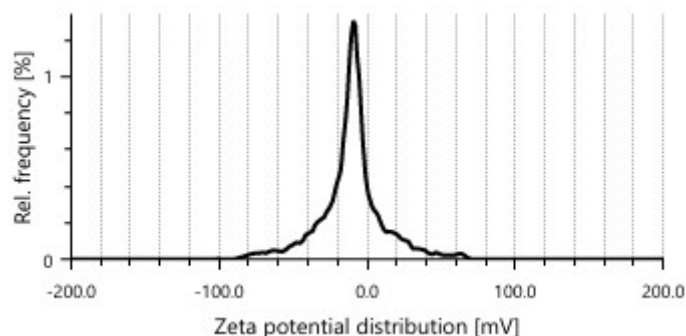

**Fig. S16:** The relative frequency vs. zeta potential distribution curve for the determination of the zeta potential of the **nBTNP-Hg<sup>2+</sup>** system.

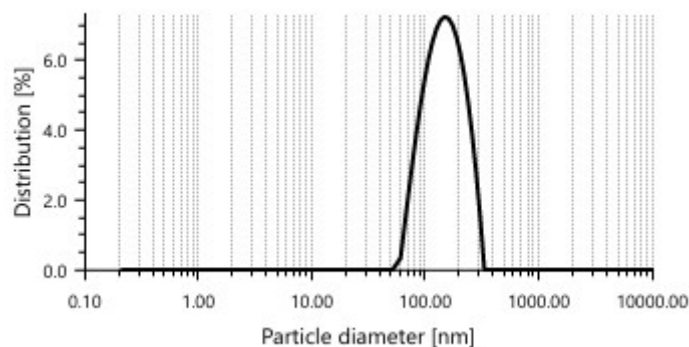

**Fig. S17:** DLS analysis showing the size distribution of the **nBTNP-Hg<sup>2+</sup>** system.

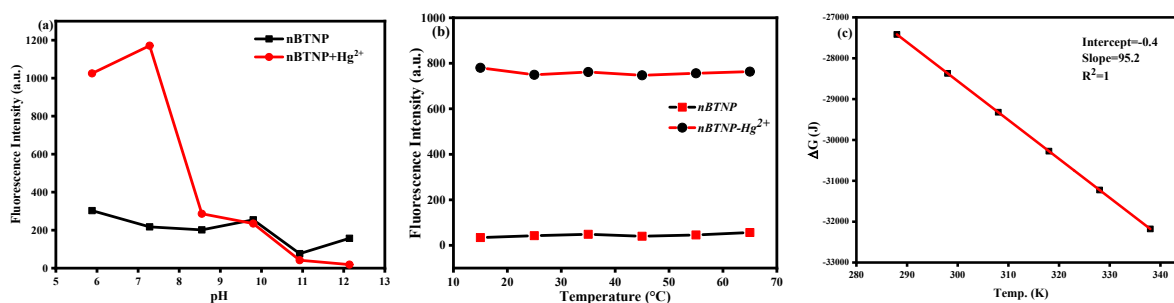

**Fig. S18:** (a) The impact of pH on photoluminescence of **nBTNP** with and without **Hg<sup>2+</sup>** at 25 °C. (b) Temperature-dependent fluorescence study of **nBTNP** and **nBTNP-Hg<sup>2+</sup>** complex. (c) The linear calibration curve for calculating the  $\Delta H$  and  $\Delta S$  values.

**Table S1.** Absorption spectra in the UV-visible range and photoluminescence data of compound C were measured in different media and expressed in nanometers.

| Solvents | Toluene | THF | DCM | DMSO | H <sub>2</sub> O |
|----------|---------|-----|-----|------|------------------|
|----------|---------|-----|-----|------|------------------|

|                               |                     |                     |        |                     |                     |
|-------------------------------|---------------------|---------------------|--------|---------------------|---------------------|
|                               | (33.9) <sup>a</sup> | (37.4) <sup>a</sup> | (40.7) | (45.1) <sup>a</sup> | (53.7) <sup>a</sup> |
| $\lambda_{\max}^{\text{abs}}$ | 355                 | 361                 | 362    | 363                 | 365                 |
| $\lambda_{\max}^{\text{flu}}$ | 416                 | 420                 | 426    | 433                 | 437                 |

<sup>a</sup> Numbers in the first brackets represent the micro-polarity values  $[E_T(30)]^2$  of the solvents.  $\lambda_{\text{exc.}} = 350$  nm.

**Table S2.** Absorption spectra in the UV-visible range and photoluminescence data of compound D were measured in different media and expressed in nanometers.

|                               |                                |                            |               |                             |                                         |
|-------------------------------|--------------------------------|----------------------------|---------------|-----------------------------|-----------------------------------------|
| Solvents                      | Toluene<br>(33.9) <sup>a</sup> | THF<br>(37.4) <sup>a</sup> | DCM<br>(40.7) | DMSO<br>(45.1) <sup>a</sup> | H <sub>2</sub> O<br>(53.7) <sup>a</sup> |
| $\lambda_{\max}^{\text{abs}}$ | 358                            | 360                        | 362           | 363                         | 364                                     |
| $\lambda_{\max}^{\text{flu}}$ | 416                            | 419                        | 427           | 433                         | 437                                     |

<sup>a</sup> Numbers in the first brackets represent the micro-polarity values  $[E_T(30)]^2$  of the solvents.  $\lambda_{\text{exc.}} = 350$  nm.

**Table S3:** Determination of  $\Delta G$  values at various temperatures.

| Temperature(°C) | $\Delta G$ (J mol <sup>-1</sup> ) |
|-----------------|-----------------------------------|
| 15              | -27418                            |
| 25              | -28370                            |
| 35              | -29322                            |
| 45              | -30274                            |
| 55              | -31226                            |
| 65              | -32178                            |

**Table S4:** Comparison with the detection limits of sensing Hg<sup>2+</sup> ions by various sensors

| Sl. No | Sensor                                                                              | Solvent                                            | Sensor type | LOD                   | LOQ                     | Portability & cost-effectivity | Application                               | Ref. |
|--------|-------------------------------------------------------------------------------------|----------------------------------------------------|-------------|-----------------------|-------------------------|--------------------------------|-------------------------------------------|------|
| 1      | 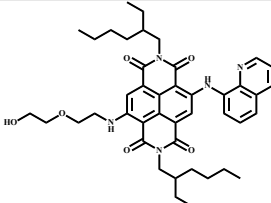   | Acetone                                            | Turn-on     | 3×10 <sup>3</sup> nM  | 10×10 <sup>3</sup> nM   | YES                            | NA                                        | 3    |
| 2      |    | ACN                                                | Turn-on     | 16 nM                 | 53.3 nM                 | NA                             | Metal ion sensor and real sample analysis | 4    |
| 3      |   | dioxane-water (1:3, v/v) solvent                   | Turn-off    | 5×10 <sup>3</sup> nM  | 16.6×10 <sup>3</sup> nM | NA                             | Metal ion sensor                          | 5    |
| 4      |  | MeCN-HEPES (9 : 1, v/v) medium                     | Turn-on     | 30×10 <sup>3</sup> nM | 100×10 <sup>3</sup> nM  | NA                             | Water sample analysis                     | 6    |
| 5      |  | 1:1 (v/v) acetonitrile/HEPES Buffer (10mM, pH 7.4) | Turn-on     | 2×10 <sup>3</sup> nM  | 6.66×10 <sup>3</sup> nM | NA                             | Water sample                              | 7    |
| 6      |  | THF                                                | Turn-off    | 17 nM                 | 56.66 nM                | YES                            | Real sample analysis                      | 8    |
| 7      |  | EtOH-water (2 : 1, v/v)                            | Turn-on     | 150 nM                | 500 nM                  | NA                             | NA                                        | 9    |
| 8      |  | aqueous MeCN                                       | Turn-off    | 90 nM                 | 300 nM                  | YES                            | Paper-test strip application              | 10   |

|    |                                                                                                                               |                                                                                        |              |                              |                                 |     |                                                   |    |
|----|-------------------------------------------------------------------------------------------------------------------------------|----------------------------------------------------------------------------------------|--------------|------------------------------|---------------------------------|-----|---------------------------------------------------|----|
| 9  | 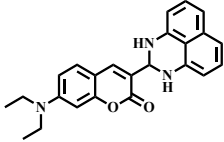                                             | CH <sub>3</sub> CN/<br>H <sub>2</sub> O (v/v<br>= 3/7)<br>solutions                    | Turn-<br>on  | 1.08×<br>10 <sup>3</sup> nM  | 3.60×<br>10 <sup>3</sup><br>nM  | NA  | Bioimaging in<br>living<br>cells and<br>zebrafish | 11 |
| 10 |                                              | DMSO/<br>H <sub>2</sub> O<br>(v/v=9/1)<br>buffered<br>by<br>50mMTris-HCl at<br>pH=7.0. | Turn-<br>off | 0.90×<br>10 <sup>3</sup> nM  | 3×10 <sup>3</sup><br>nM         | YES | Water<br>sample                                   | 12 |
| 11 |                                              | 50%<br>(1:1, v/v)<br>H <sub>2</sub> O/DM<br>SO                                         | Turn-<br>on  | 0.40×1<br>0 <sup>3</sup> nM  | 1.33×<br>10 <sup>3</sup><br>nM  | YES | Real<br>sample<br>analysis                        | 13 |
| 12 |                                              | DMSO-<br>water<br>(1 : 1,<br>v/v)                                                      | Turn-<br>on  | 20.70<br>nM                  | 69 nM                           | YES | Water<br>sample<br>analysis                       | 14 |
| 13 | <br><small>Molecular Weight: 464.56</small> | Mixture<br>of THF<br>and<br>water                                                      | Turn-<br>off | 17.20×<br>10 <sup>3</sup> nM | 56.76<br>×10 <sup>3</sup><br>nM | YES | Paper-<br>based<br>sensor                         | 15 |
| 14 |                                            | MeCN/H<br>2O (8:2<br>v/v)                                                              | Turn-<br>on  | 6.90×<br>10 <sup>3</sup> nM  | 23×<br>10 <sup>3</sup><br>nM    | NA  | Real-<br>time<br>monitori<br>ng                   | 16 |
| 15 |                                            | H <sub>2</sub> O:<br>EtOH=7:<br>1, v/v                                                 | Turn-<br>off | 22.50×<br>10 <sup>3</sup> nM | 75×<br>10 <sup>3</sup><br>nM    | NA  | NA                                                | 17 |
| 16 |                                            | Dioxane-<br>H <sub>2</sub> O<br>(9:1, v/v)                                             | Turn-<br>off | 30×10 <sup>3</sup><br>nM     | 100×<br>10 <sup>3</sup><br>nM   | NA  | NA                                                | 18 |
| 17 |                                            | Acetate<br>buffer<br>aqueous<br>10%<br>DMSO                                            | Turn-<br>off | 15×10 <sup>3</sup><br>nM     | 50×<br>10 <sup>3</sup><br>nM    | NA  | NA                                                | 19 |
| 18 |                                            | CH <sub>3</sub> CN-<br>H <sub>2</sub> O<br>(1:1)                                       | Turn-<br>on  | 18.10×<br>10 <sup>3</sup> nM | 60.33<br>×10 <sup>3</sup><br>nM | YES | NA                                                | 20 |

|    |                                                                                     |                                                                               |                      |                             |                                |     |                            |    |
|----|-------------------------------------------------------------------------------------|-------------------------------------------------------------------------------|----------------------|-----------------------------|--------------------------------|-----|----------------------------|----|
| 19 | 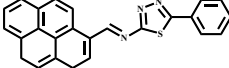   | Buffer-<br>CH <sub>3</sub> CN<br>(3:7, v/v,<br>10 mM,<br>pH=7.4)              | Turn-<br>on          | 36 nM                       | 120<br>nM                      | YES | NA                         | 21 |
| 20 |    | H <sub>2</sub> O<br>(pH=<br>7.4)                                              | Turn-<br>off         | 0.06×1<br>0 <sup>3</sup> nM | 0.20×<br>10 <sup>3</sup><br>nM | YES | NA                         | 22 |
| 21 |    | DMSO-<br>Water<br>(1:99,<br>v/v,<br>HEPES<br>buffer<br>pH=7.2                 | Ratio-<br>metri<br>c | 14.70<br>nM                 | 49 nM                          | NA  | NA                         | 23 |
| 22 |    | Ethanol-<br>water<br>(3:7)                                                    | Ratio-<br>metri<br>c | 45.40<br>nM                 | 151.3<br>3 nM                  | NA  | Real<br>sample<br>analysis | 24 |
| 23 |   | DMSO/T<br>ris-HCl<br>(8:2, v/v,<br>pH=7.0)                                    | Turn-<br>off         | 31 nM                       | 103.3<br>3 nM                  | YES | Real<br>sample<br>analysis | 25 |
| 24 |  | HEPES<br>buffer<br>(20 mM,<br>3:7<br>CH <sub>3</sub> CN/<br>H <sub>2</sub> O) | Turn-<br>off         | 50 nM                       | 166.6<br>7 nM                  | YES | Solid<br>sensor            | 26 |
| 25 |  | Ethanol-<br>water<br>(6:4, v/v)                                               | Turn-<br>off         | 17.80<br>nM                 | 59.33<br>nM                    | NA  | NA                         | 27 |
| 26 |  | CH <sub>3</sub> CN-<br>H <sub>2</sub> O<br>(5:95,<br>v/v)                     | Turn-<br>on          | 145×<br>10 <sup>3</sup> nM  | 478×<br>10 <sup>3</sup><br>nM  | NA  | NA                         | 28 |
| 27 |  | Aqueous<br>(1%<br>DMSO)                                                       | Turn-<br>on          | 591.90<br>nM                | 1.90×<br>10 <sup>3</sup><br>nM | NA  | NA                         | 29 |

|    |                                                                                     |                                                           |                      |                             |                                |     |                            |    |
|----|-------------------------------------------------------------------------------------|-----------------------------------------------------------|----------------------|-----------------------------|--------------------------------|-----|----------------------------|----|
| 28 | 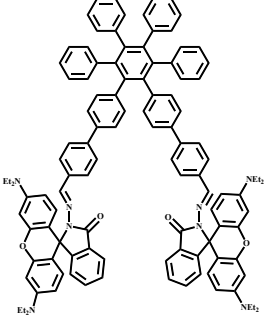   | MeCN-water<br>(1 : 1,<br>v/v)                             | Turn-on              | 100 nM                      | 0.33×<br>10 <sup>3</sup><br>nM | NA  | NA                         | 30 |
| 29 |    | MeOH-Tris-HCl<br>(95:5,<br>v/v,<br>pH=7.2)                | Turn-off             | 7.38<br>nM                  | 24.60<br>nM                    | NA  | NA                         | 31 |
| 30 |    | Aqueous<br>medium                                         | Turn-off             | 0.34×<br>10 <sup>3</sup> nM | 1.13×<br>10 <sup>3</sup><br>nM | YES | Real-time<br>sensing       | 32 |
| 31 |   | Aqueous<br>medium                                         | Ratio-<br>metri<br>c | 0.19×<br>10 <sup>3</sup> nM | 0.63×<br>10 <sup>3</sup><br>nM | YES | Real<br>sample<br>analysis | 33 |
| 32 |  | EtOH-water<br>(5/5, v/v,<br>HEPES<br>pH =<br>7.4)         | Turn-on              | 55 nM                       | 183.3<br>0 nM                  | NA  | NA                         | 34 |
| 33 |  | THF-water<br>(1 : 1,<br>v/v)                              | Ratio-<br>metri<br>c | 0.31×<br>10 <sup>3</sup> nM | 1.03×<br>10 <sup>3</sup><br>nM | NA  | NA                         | 35 |
| 34 |  | HEPES<br>buffer/D<br>MSO<br>(v/v = 9 :<br>1, pH =<br>7.2) | Turn-on              | 70 nM                       | 0.23×<br>10 <sup>3</sup><br>nM | NA  | biologica<br>l systems     | 36 |
| 35 |  | PBS/EtO<br>H (9 : 1,<br>v/v)<br>medium                    | Turn-on              | 9.10<br>nM                  | 30.33<br>nM                    | NA  | Real<br>sample<br>analysis | 37 |
| 36 |  | HEPES<br>buffer<br>solution<br>(20 mM,<br>pH 7.4,<br>1%)  | Turn-on              | 40 nM                       | 133.3<br>0 nM                  | NA  | NA                         | 38 |

|    |                                                                                   |                                          |                                               |                        |                                  |            |                                     |                           |
|----|-----------------------------------------------------------------------------------|------------------------------------------|-----------------------------------------------|------------------------|----------------------------------|------------|-------------------------------------|---------------------------|
|    |                                                                                   | EtOH)                                    |                                               |                        |                                  |            |                                     |                           |
| 37 | 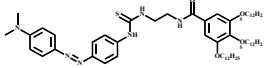 | ACN                                      | Color i-<br>metri<br>c                        | 9.22<br>nM             | 30.73<br>nM                      | NA         | Multiple<br>metal<br>sensors        | 39                        |
| 38 |  | methanol<br>-water (1<br>: 1)<br>mixture | Color<br>i-<br>metri<br>c                     | $47 \times 10^3$<br>nM | $156.6$<br>$6 \times 10^3$<br>nM | YES        | Real<br>sample<br>analysis          | 40                        |
| 39 |  | EtOH-<br>water<br>(1 : 1,<br>v/v)        | Turn-<br>on                                   | 10.3<br>nM             | $34.33$<br>$\times 10^3$<br>nM   | YES        | Real<br>sample<br>analysis          | 41                        |
| 40 | <b>nBTNP</b>                                                                      | <b>100%<br/>water</b>                    | <b>Shifti<br/>ng<br/>and<br/>turn-<br/>on</b> | <b>9.6 nM</b>          | <b>31.68<br/>nM</b>              | <b>YES</b> | <b>Real<br/>sample<br/>analysis</b> | <b>This<br/>wor<br/>k</b> |

## References

- 1 J. N. Demas and G. A. Crosby, Measurement of photoluminescence quantum yields. Review, *J. Phys. Chem.*, 1971, **75**, 991–1024.
- 2 C. Reichardt, Solvatochromic dyes as solvent polarity indicators, *Chem. Rev.*, 1994, **94**, 2319–2358.
- 3 L. Zong, C. Wang, Y. Song, Y. Xie, P. Zhang, Q. Peng, Q. Li and Z. Li, A dual-function probe based on naphthalene diimide for fluorescent recognition of  $\text{Hg}^{2+}$  and colorimetric detection of  $\text{Cu}^{2+}$ , *Sensors Actuators B Chem.*, 2017, **252**, 1105–1111.
- 4 J. Hu, X. Yu, X. Zhang, C. Jing, T. Liu, X. Hu, S. Lu, K. Uvdal, H. W. Gao, and Z. Hu, Rapid detection of mercury (II) ions and water content by a new rhodamine B-based fluorescent chemosensor, *Spectrochim. Acta Part A Mol. Biomol. Spectrosc.*, 2020, **241**, 118657.
- 5 S. Y. Moon, N. R. Cha, Y. H. Kim and S. K. Chang, New  $\text{Hg}^{2+}$ -Selective Chromo- and Fluoroionophore Based upon 8-Hydroxyquinoline, *J. Org. Chem.*, 2004, **69**, 181–183.
- 6 M. Hong, S. Lu, F. Lv, and D. Xu, A novel facilely prepared rhodamine-based  $\text{Hg}^{2+}$

- fluorescent probe with three thiourea receptors, *Dye. Pigment*, 2016, **127**, 94–99.
- 7 R. Singh and G. Das, Fluorogenic detection of Hg<sup>2+</sup> and Ag<sup>+</sup> ions via two mechanistically discrete signal genres: A paradigm of differentially responsive metal ion sensing, *Sensors Actuators B Chem.*, 2018, **258**, 478–483.
- 8 N. Tohora, R. Sahoo, S. Ahamed, J. Chourasia, S. Lama, M. Mahato, S. Ali, and S. Kumar Das, Hg(II) causes photoluminescence quenching of pyrene inside a blue-emitting ionic liquid-derived crystalline nanoball, *Phys. Chem. Chem. Phys.*, 2025, **27**, 9478–9490.
- 9 M. Ozdemir, A rhodamine-based colorimetric and fluorescent probe for dual sensing of Cu<sup>2+</sup> and Hg<sup>2+</sup> ions, *J. Photochem. Photobiol. A Chem.*, 2016, **318**, 7–13.
- 10 Chethanakumar, M. Budri, K. B. Gudasi, R. S. Vadavi and S. S. Bhat, Luminescent Pyrene-based Schiff base Receptor for Hazardous Mercury(II) Detection Demonstrated by Cell Imaging and Test Strip, *J. Fluoresc.*, 2023, **33**, 539–551.
- 11 C. G. Chen, N. Vijay, N. Thirumalaivasan, S. Velmathi, and S. P. Wu, Coumarin-based Hg<sup>2+</sup> fluorescent probe: Fluorescence turn-on detection for Hg<sup>2+</sup> bioimaging in living cells and zebrafish, *Spectrochim. Acta Part A Mol. Biomol. Spectrosc.*, 2019, **219**, 135–140.
- 12 L. Feng, W. Shi, J. Ma, Y. Chen, F. Kui, Y. Hui and Z. Xie, A novel thiosemicarbazone Schiff base derivative with aggregation-induced emission enhancement characteristics and its application in Hg<sup>2+</sup> detection, *Sensors Actuators B Chem.*, 2016, **237**, 563–569.
- 13 T. Sultana, M. Mahato, S. Ahamed, N. Tohora, J. Chourasia, S. Ghanta, and S. Kumar Das, A ‘Turn-on’ fluorogenic probe for selective and specific detection of Hg(II) ions, *J. Photochem. Photobiol. A Chem.*, 2025, **459**, 116028.
- 14 G. Yang, X. Meng, S. Fang, H. Duan, L. Wang and Z. Wang, A highly selective

- colorimetric fluorescent probe for detection of Hg<sup>2+</sup> and its application on test strips, *RSC Adv.*, 2019, **9**, 8529–8536.
- 15 E. G. C. Ergun, Three-in-one sensor: a fluorometric, colorimetric and paper-based probe for the selective detection of mercury(II), *New J. Chem.*, 2021, **45**, 4202–4209.
- 16 T. Rasheed, F. Nabeel, M. Bilal, Y. Zhao, M. Adeel, H. M. N. Iqbal, T. Rasheed, F. Nabeel, M. Bilal, Y. Zhao, M. Adeel, and H. M. N. Iqbal, Aqueous monitoring of toxic mercury through a rhodamine-based fluorescent sensor, *Math. Biosci. Eng.* 2019 *41861*, 2019, **16**, 1861–1873.
- 17 H. H. Wu, Y. L. Sun, C. F. Wan, S. T. Yang, S. J. Chen, C. H. Hu, and A. T. Wu, Highly selective and sensitive fluorescent chemosensor for Hg<sup>2+</sup> in aqueous solution, *Tetrahedron Lett.*, 2012, **53**, 1169–1172.
- 18 Y. H. Kim, S. Y. Jin, Y. M. So, J. I. Choe, and S. K. Chang, Hg<sup>2+</sup>-selective Fluorogenic Chemosensor Derived from 8-Aminoquinoline, *Chem. Lett.*, 2004, **33**, 702–703.
- 19 M. G. Choi, H. De Ryu, H. L. Jeon, S. Cha, J. Cho, H. H. Joo, K. S. Hong, C. Lee, S. Ann, and S. K. Chang, Chemodosimetric Hg<sup>2+</sup>-selective signaling by mercuration of dichlorofluorescein derivatives, *Org. Lett.*, 2008, **10**, 3717–3720.
- 20 A. Maity, A. Sil, S. Nad and S. K. Patra, A highly selective, sensitive and reusable BODIPY based ‘OFF/ON’ fluorescence chemosensor for the detection of Hg<sup>2+</sup> Ions, *Sensors Actuators B Chem.*, 2018, **255**, 299–308.
- 21 C. B. Bai, P. Xu, J. Zhang, R. Qiao, M. Y. Chen, M. Y. Mei, B. Wei, C. Wang, L. Zhang, and S. S. Chen, Long-Wavelength Fluorescent Chemosensors for Hg<sup>2+</sup> based on Pyrene, *ACS Omega*, 2019, **4**, 14621–14625.
- 22 A. Kumar, R. Ananthakrishnan, G. Jana, P. K. Chattaraj, S. Nayak and S. K. Ghosh, An Intramolecular Charge Transfer Induced Fluorescent Chemosensor for Selective

- Detection of Mercury (II) and its Self-Turn-On Inside Live Cells at Physiological pH, *ChemistrySelect*, 2019, **4**, 4810–4819.
- 23 B. Muzeý and A. Naseem, An AIEE active 1, 8-naphthalimide- sulfamethizole probe for ratiometric fluorescent detection of Hg<sup>2+</sup> ions in aqueous media, *J. Photochem. Photobiol. A Chem.*, 2020, **391**, 112354.
- 24 Y. Yuan, X. Chen, Q. Chen, G. Jiang, H. Wang, and J. Wang, New switch on fluorescent probe with AIE characteristics for selective and reversible detection of mercury ion in aqueous solution, *Anal. Biochem.*, 2019, **585**, 113403.
- 25 Y. Li, W. Shi, J. Ma, X. Wang, X. Kong, Y. Zhang, L. Feng, Y. Hui, and Z. Xie, A novel optical probe for Hg<sup>2+</sup> in aqueous media based on mono-thiosemicarbazone Schiff base, *J. Photochem. Photobiol. A Chem.*, 2017, **338**, 1–7.
- 26 Shaily, A. Kumar and N. Ahmed, Indirect Approach for CN<sup>-</sup> Detection: Development of ‘naked-Eye’ Hg<sup>2+</sup>-Induced Turn-Off Fluorescence and Turn-On Cyanide Sensing by the Hg<sup>2+</sup> Displacement Approach, *Ind. Eng. Chem. Res.*, 2017, **56**, 6358–6368.
- 27 K. M. Vengaiyan, C. D. Britto, K. Sekar, G. Sivaraman and S. Singaravadivel, Phenothiazine-diaminomalenonitrile based Colorimetric and Fluorescence “Turn-off-on” Sensing of Hg<sup>2+</sup> and S<sup>2-</sup>, *Sensors Actuators B Chem.*, 2016, **235**, 232–240.
- 28 M. Lo Presti, R. Martínez-Máñez, J. V. Ros-Lis, R. M. F. Batista, S. P. G. Costa, M. M. Raposo and F. Sancenón, A dual channel sulphur-containing a macrocycle functionalised BODIPY probe for the detection of Hg(II) in a mixed aqueous solution, *New J. Chem.*, 2018, **42**, 7863–7868.
- 29 R. X. Zhang, P. F. Li, W. J. Zhang, N. Li and N. Zhao, A highly sensitive fluorescent sensor with aggregation-induced emission characteristics for the detection of iodide and mercury ions in aqueous solution, *J. Mater. Chem. C*, 2016, **4**, 10479–10485.
- 30 G. Singh, S. I. Reja, V. Bhalla, D. Kaur, P. Kaur, S. Arora and M. Kumar,

- Hexaphenylbenzene appended AIEE active FRET based fluorescent probe for selective imaging of  $\text{Hg}^{2+}$  ions in MCF-7 cell lines, *Sensors Actuators B Chem.*, 2017, **249**, 311–320.
- 31 P. Piyanuch, S. Watpathomsub, V. S. Lee, H. A. Nienaber and N. Wanichacheva, Highly sensitive and selective  $\text{Hg}^{2+}$ -chemosensor based on dithia-cyclic fluorescein for optical and visual-eye detections in aqueous buffer solution, *Sensors Actuators B Chem.*, 2016, **224**, 201–208.
- 32 R. V. Rathod, S. Bera, P. Maity and D. Mondal, Mechanochemical Synthesis of a Fluorescein-Based Sensor for the Selective Detection and Removal of  $\text{Hg}^{2+}$  Ions in Industrial Effluents, *ACS Omega*, 2020, **5**, 4982–4990.
- 33 J. Wang, Q. Rao, H. Wang, Q. Zhang, G. Liu, Z. Wu, J. Yu, X. Zhu, Y. Tian, and H. Zhou, A terpyridine-based test strip for the detection of  $\text{Hg}^{2+}$  in various water samples and drinks, *Anal. Methods*, 2019, **11**, 227–231.
- 34 J. Xu, Z. Xu, Z. Wang, C. Liu, B. Zhu, X. Wang, K. Wang, J. Wang, and G. Sang, A carbonothioate-based highly selective fluorescent probe with a large Stokes shift for detection of  $\text{Hg}^{2+}$ , *Luminescence*, 2018, **33**, 219–224.
- 35 T. Leng, Y. Ma and G. Chen, A novel ratiometric fluorescence and colorimetric probe with a large Stokes shift for  $\text{Hg}^{2+}$  sensing, *J. Photochem. Photobiol. A Chem.*, 2018, **353**, 143–149.
- 36 Y. Gao, C. Zhang, S. Peng and H. Chen, A fluorescent and colorimetric probe enables simultaneous differential detection of  $\text{Hg}^{2+}$  and  $\text{Cu}^{2+}$  by two different mechanisms, *Sensors Actuators B Chem.*, 2017, **238**, 455–461.
- 37 Y. Li, S. Qi, C. Xia, Y. Xu, G. Duan, and Y. Ge, A FRET ratiometric fluorescent probe for detection of  $\text{Hg}^{2+}$  based on an imidazo[1,2-a]pyridine-rhodamine system, *Anal. Chim. Acta*, 2019, **1077**, 243–248.

- 38 A. Picard-Lafond, D. Larivière and D. Boudreau, Revealing the Hydrolysis Mechanism of a Hg<sup>2+</sup>-Reactive Fluorescein Probe: Novel Insights on Thionocarbonated Dyes, *ACS Omega*, 2020, **5**, 701–711.
- 39 X. Cao, Y. Li, Y. Yu, S. Fu, A. Gao and X. Chang, Multifunctional supramolecular self-assembly system for colorimetric detection of Hg<sup>2+</sup>, Fe<sup>3+</sup>, Cu<sup>2+</sup>, and continuous sensing of volatile acids and organic amine gases, *Nanoscale*, 2019, **11**, 10911–10920.
- 40 T. Anand and S. K. Sahoo, Cost-effective approach to detect Cu(II) and Hg(II) by integrating a smartphone with the colorimetric response from a NBD-benzimidazole based dyad, *Phys. Chem. Chem. Phys.*, 2019, **21**, 11839–11845.
- 41 L. Lan, Q. Niu and T. Li, A highly selective colorimetric and ratiometric fluorescent probe for instantaneous sensing of Hg<sup>2+</sup> in water, soil, and seafood and its application on test strips, *Anal. Chim. Acta*, 2018, **1023**, 105–114.
